# Supplementary material
Source: ML conference proceedings conference paper supplement (https://openreview.net/forum?id=ah2gZLdT9u)

$$\beta = 2, p = 0.5, r = 1.25$$

Relative Bias

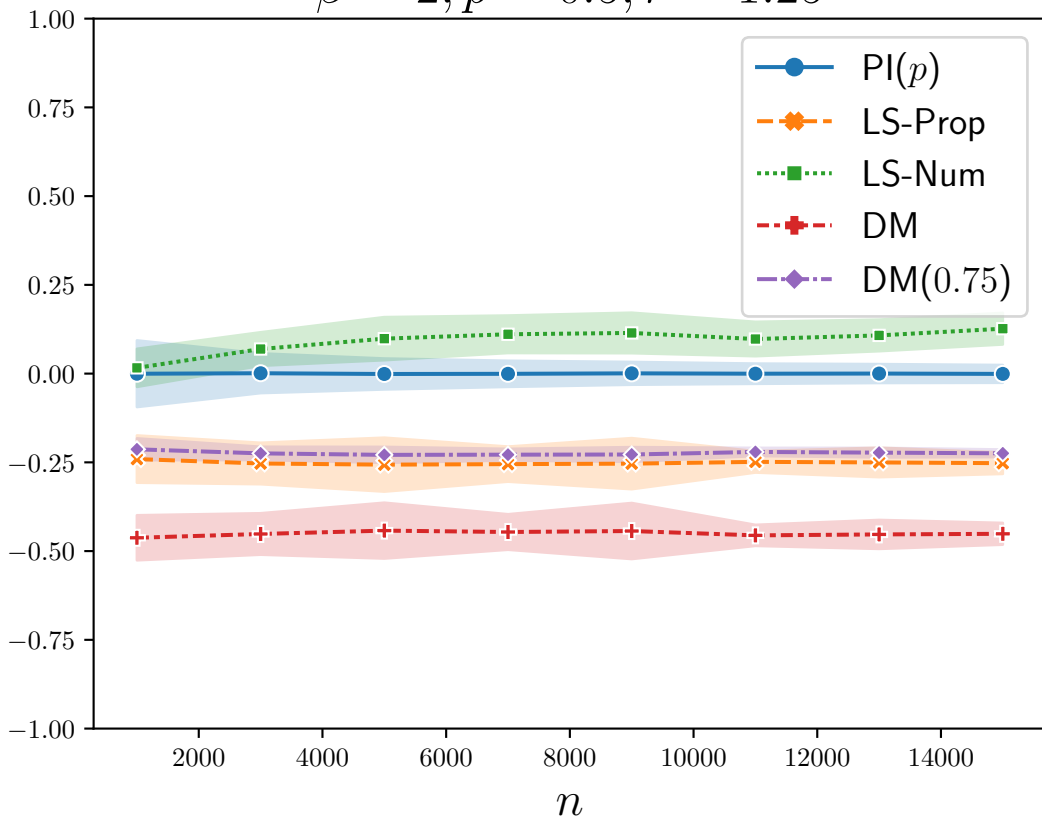

Supplement: supplementary_material [file attachment]

$$\beta = 1, n = 5000, p = 0.05$$

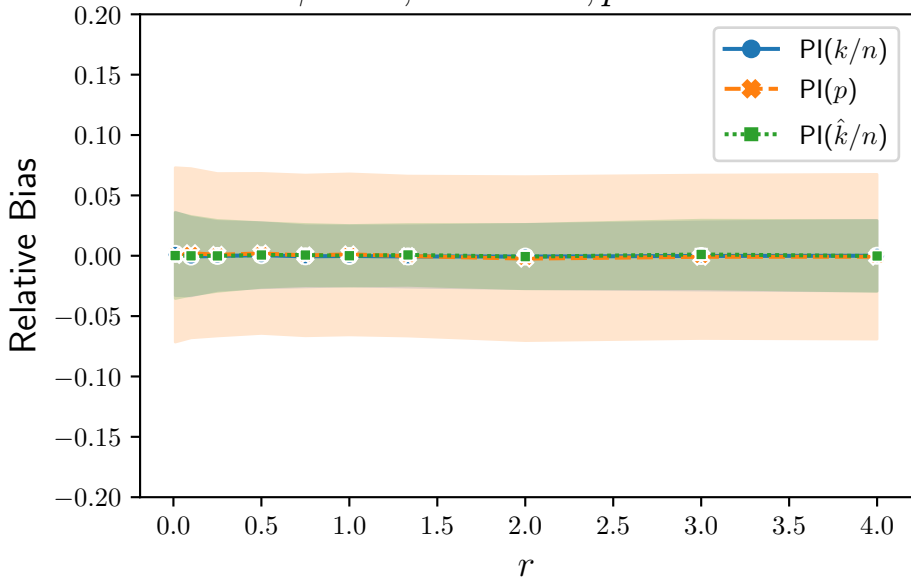

Supplement: supplementary_material [file attachment]

$$\beta = 2, k/n = 0.15, r = 1.25$$

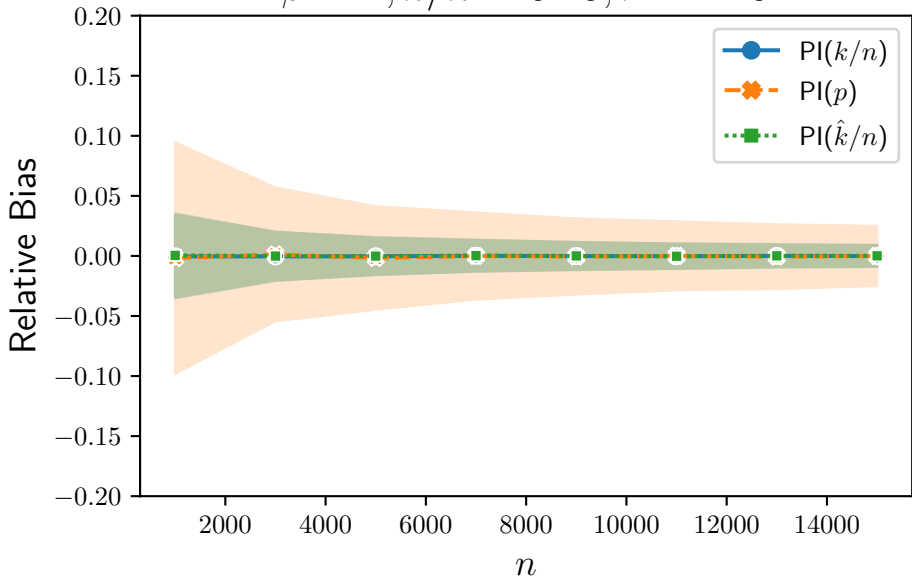

Supplement: supplementary_material [file attachment]

$$\beta = 1, n = 5000, r = 1.25$$

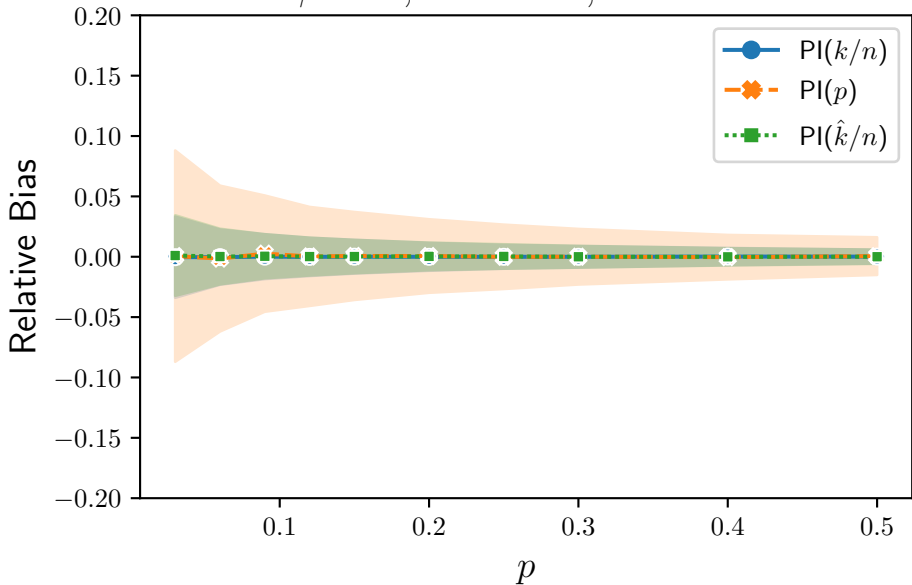

Supplement: supplementary_material [file attachment]

$$\beta = 1, n = 15000, p = 0.05$$

Relative Bias

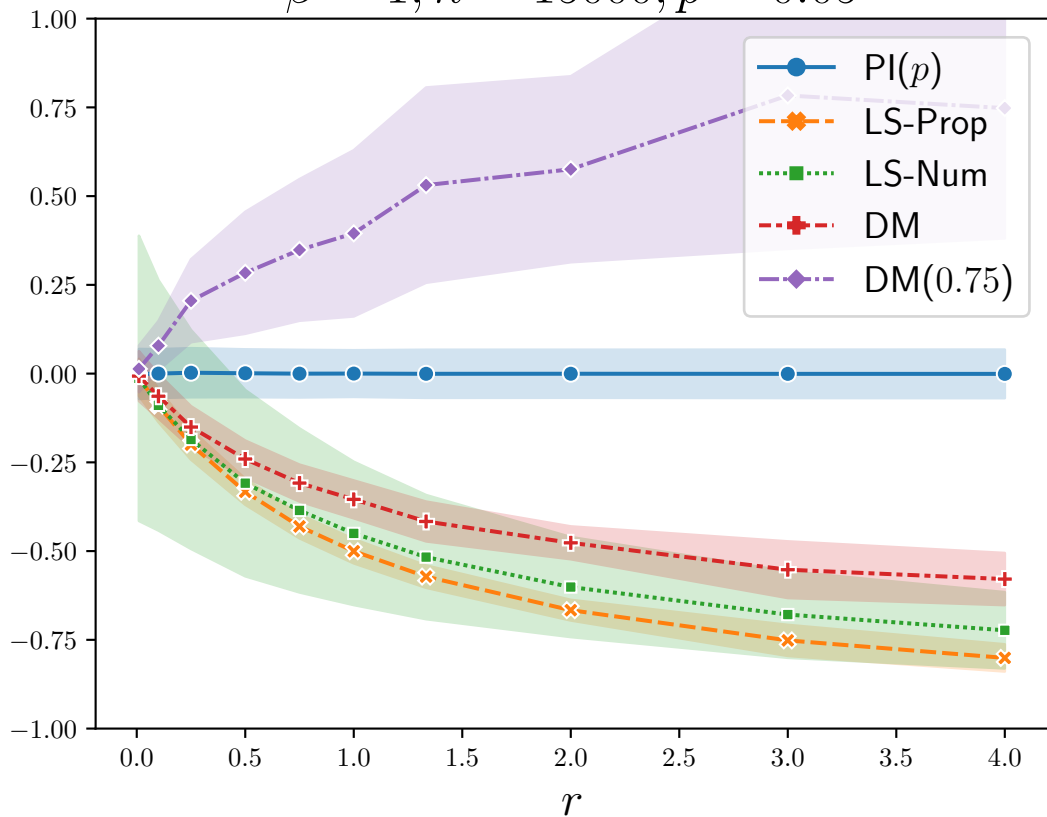

Supplement: supplementary_material [file attachment]

$$\beta = 1, n = 5000, r = 1.25$$

Relative Bias

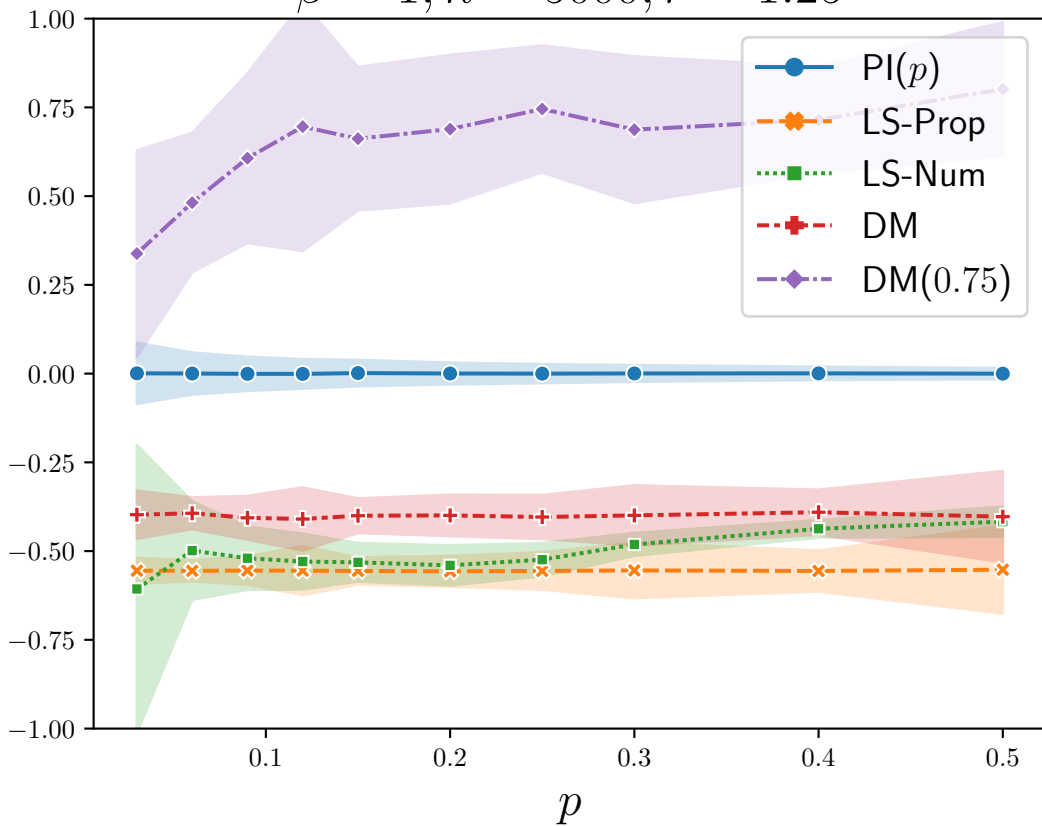

Supplement: supplementary_material [file attachment]

$$\beta = 2, n = 5000, r = 1.25$$

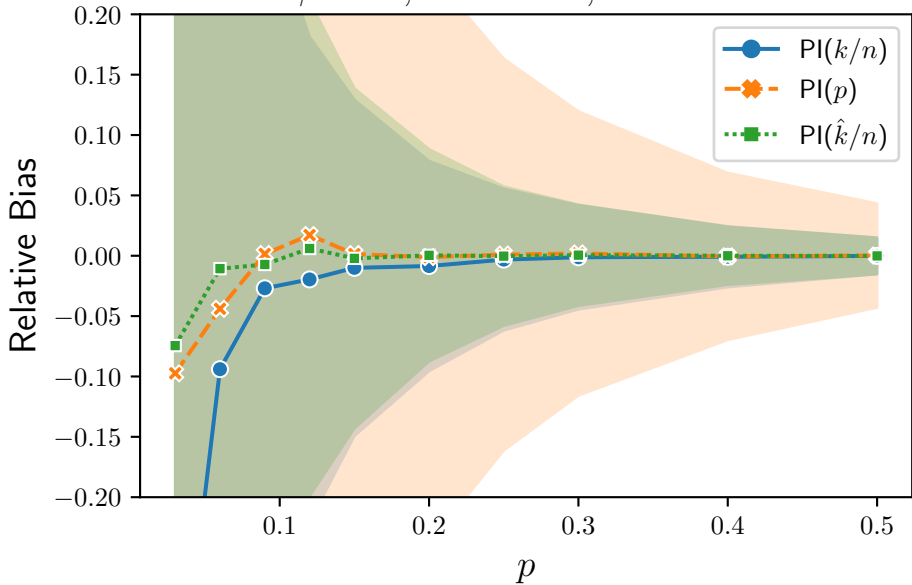

Supplement: supplementary_material [file attachment]

$$\beta = 2, n = 15000, p = 0.15$$

Relative Bias

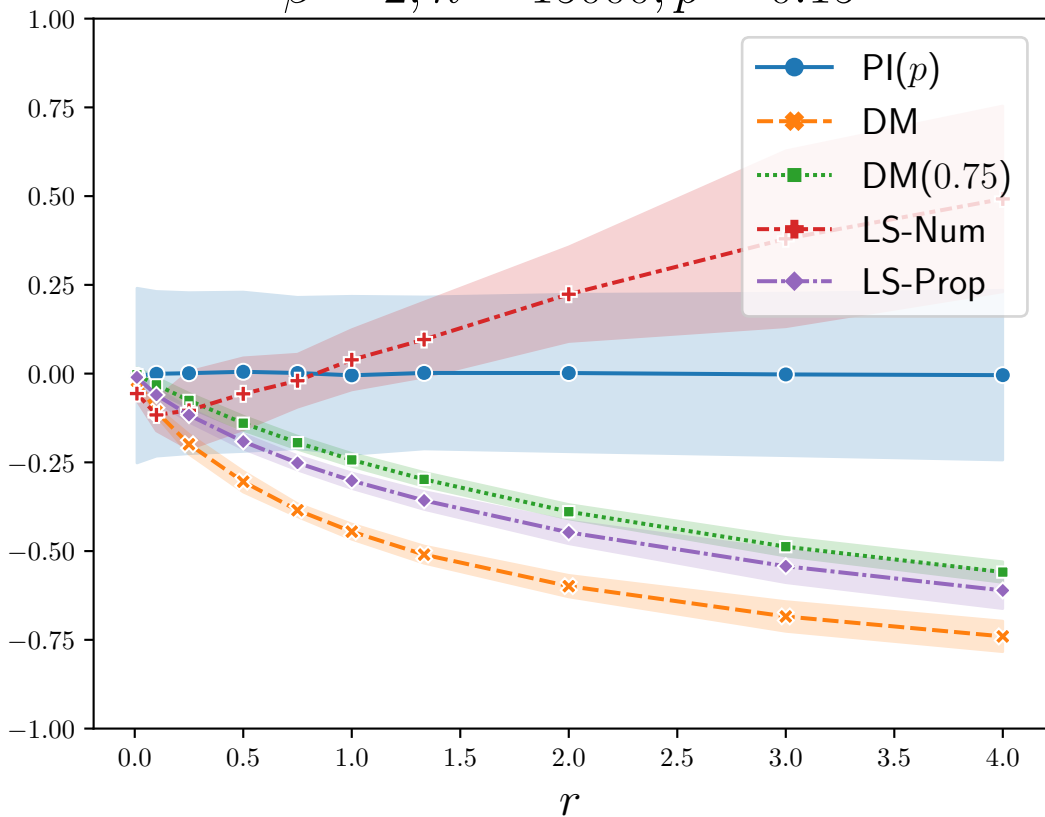

Supplement: supplementary_material [file attachment]

$$\beta = 2, n = 5000, p = 0.15$$

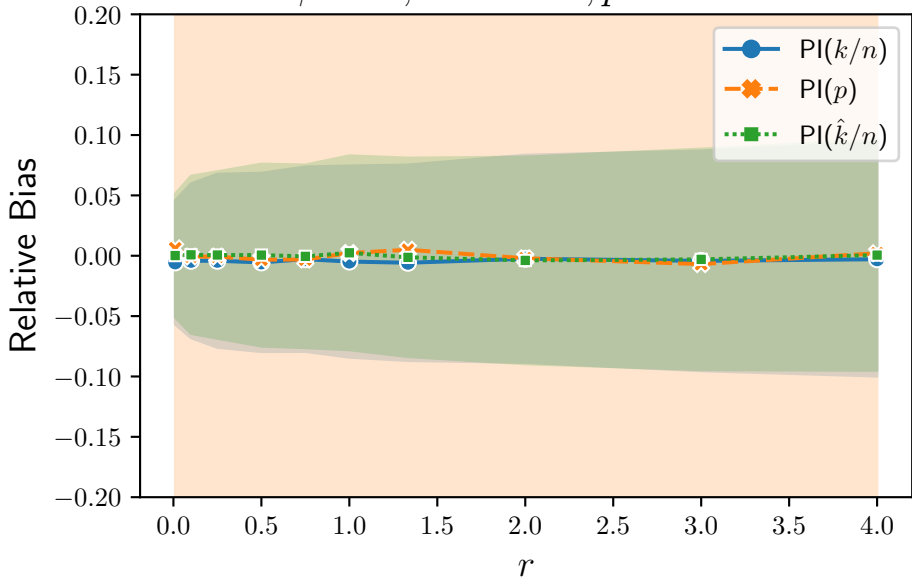

Supplement: supplementary_material [file attachment]

$$\beta = 2, n = 5000, p = 0.15$$

Relative Bias

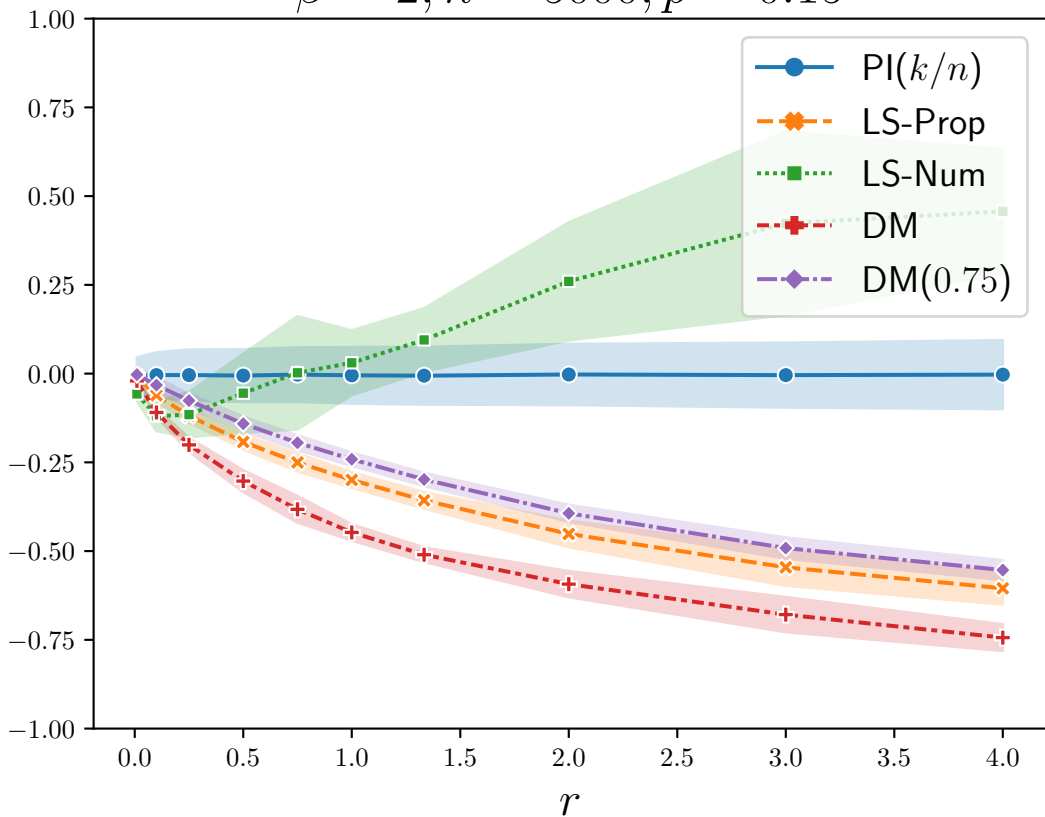

Supplement: supplementary_material [file attachment]

$$n = 15000, p = 0.5, r = 1.25$$

Relative Bias

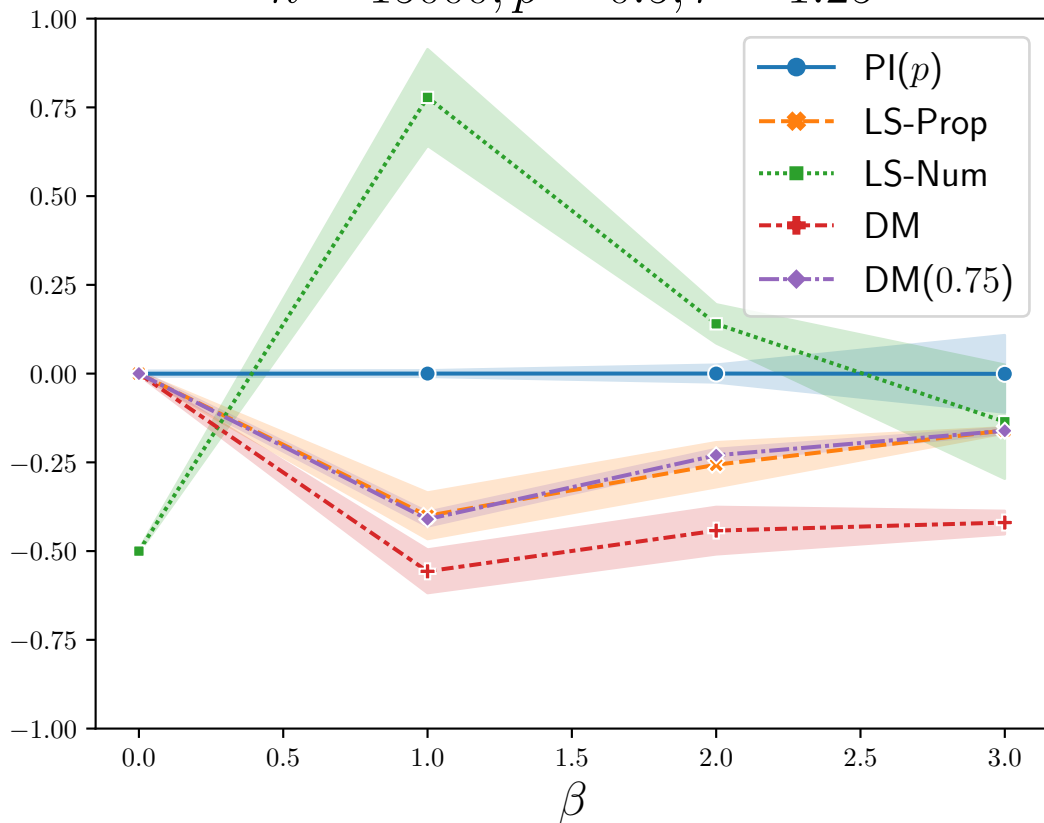

Supplement: supplementary_material [file attachment]

$$\beta = 1, p = 0.05, r = 1.25$$

Relative Bias

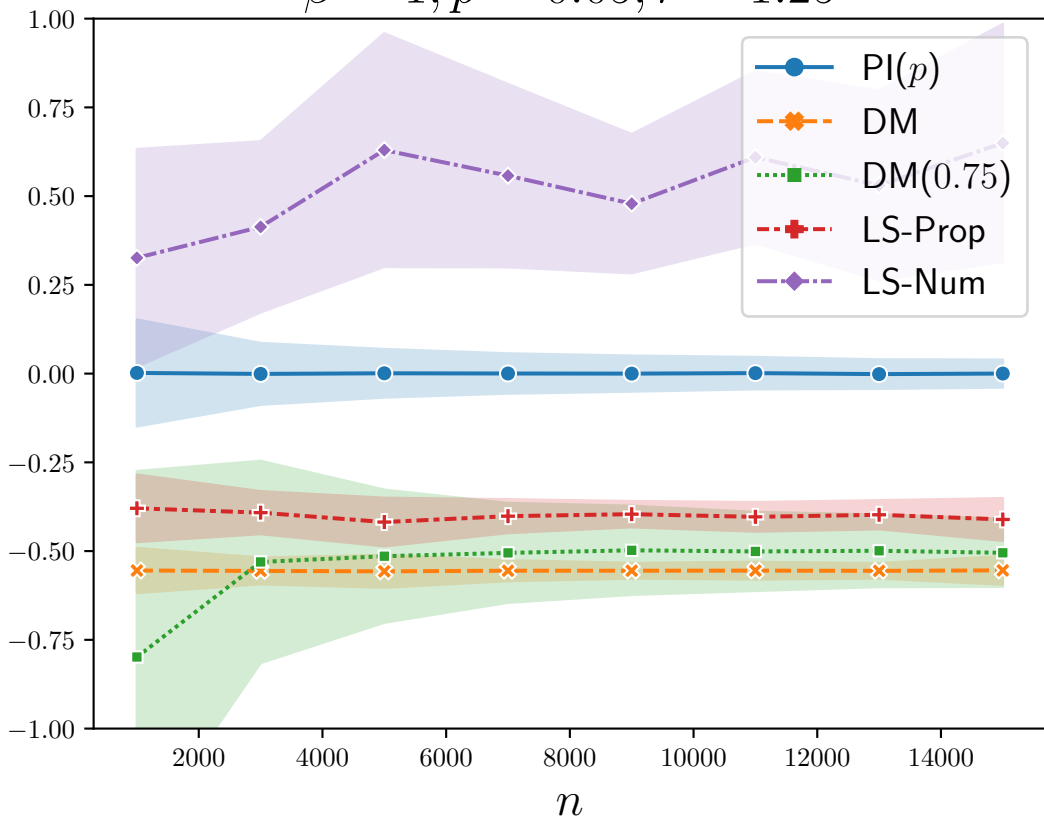

Supplement: supplementary_material [file attachment]

$$\beta = 1, n = 5000, r = 1.25$$

Relative Bias

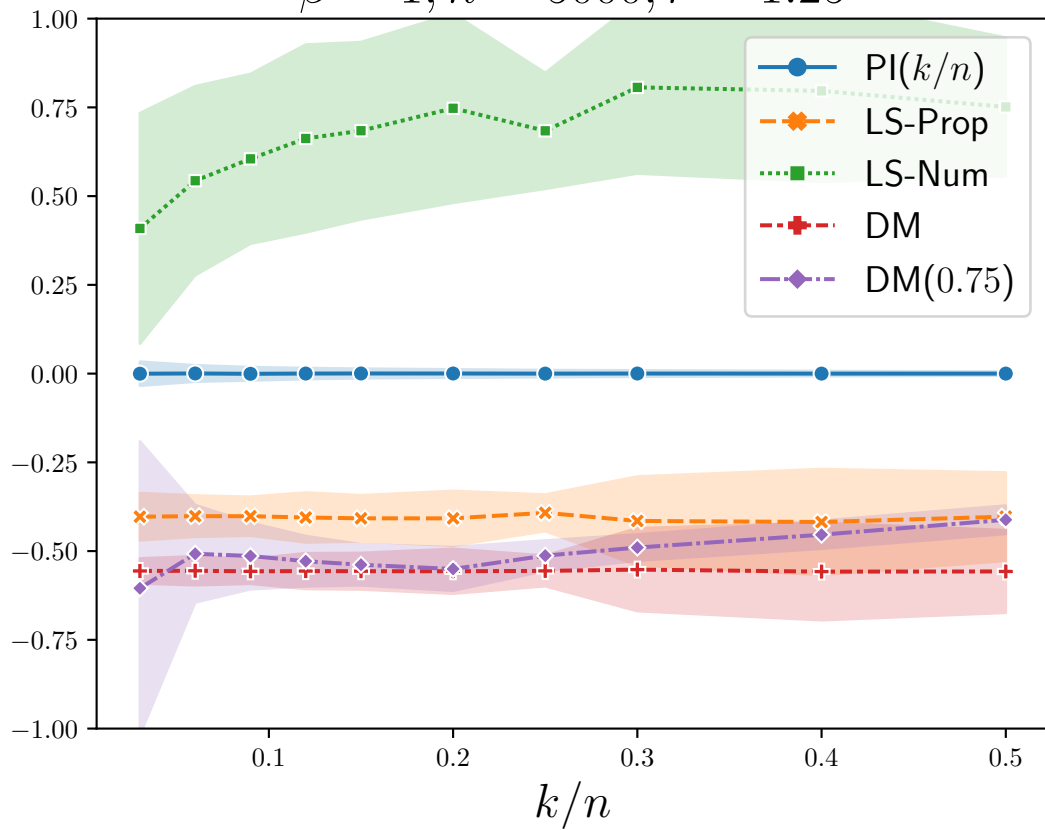

Supplement: supplementary_material [file attachment]

$$\beta = 1, p = 0.05, r = 1.25$$

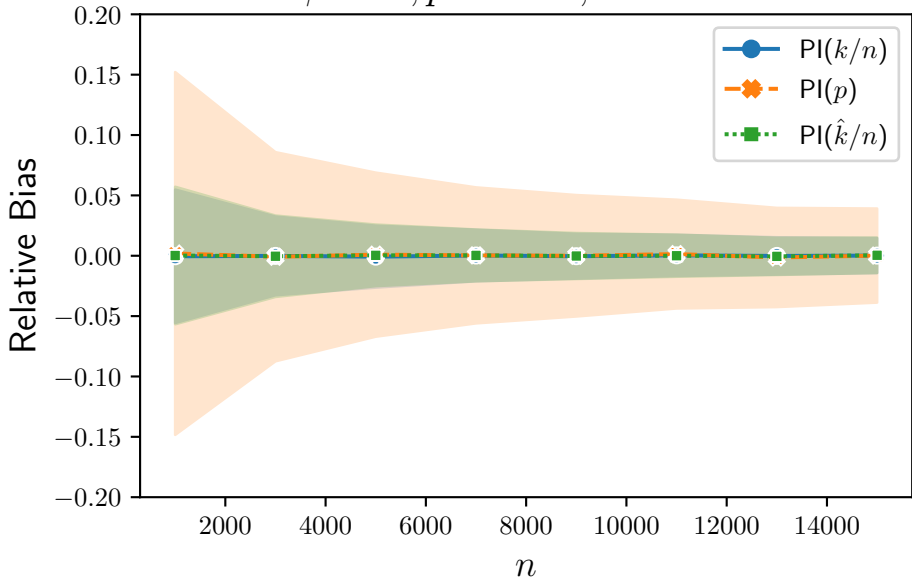

Supplement: supplementary_material [file attachment]

$$\beta = 2, n = 5000, r = 1.25$$

Relative Bias

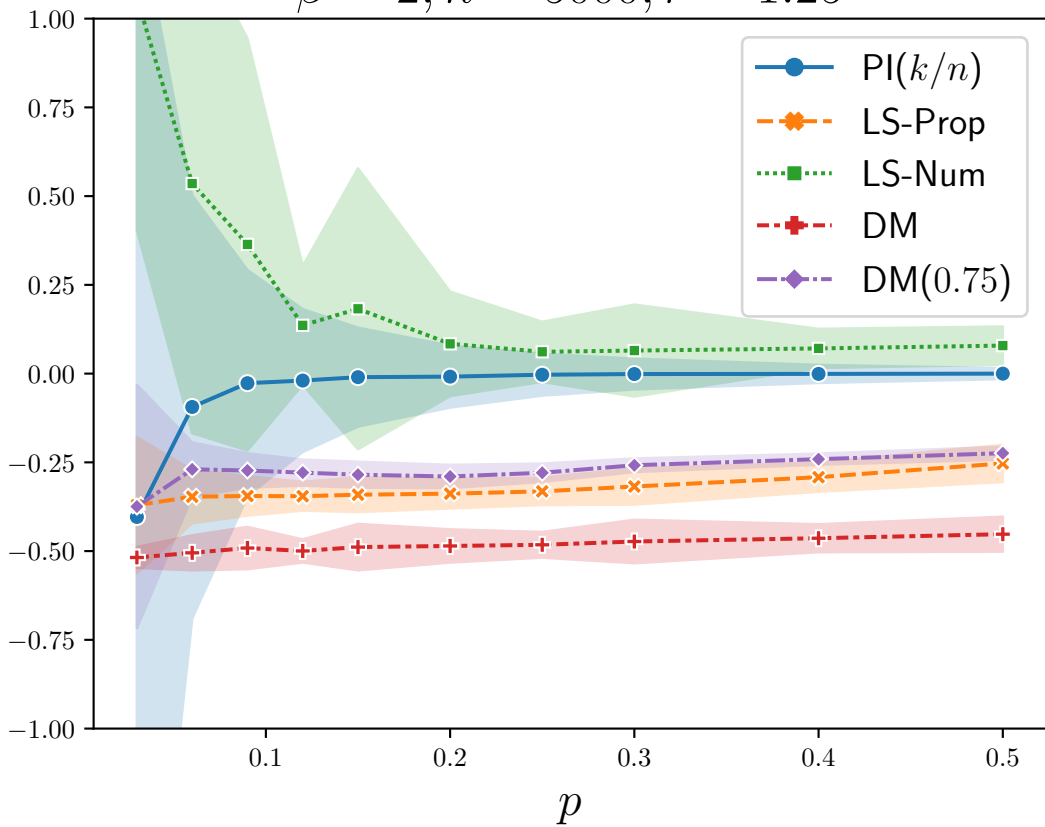

Supplement: supplementary_material [file attachment]

$$\beta = 2, n = 5000, p = 0.5$$

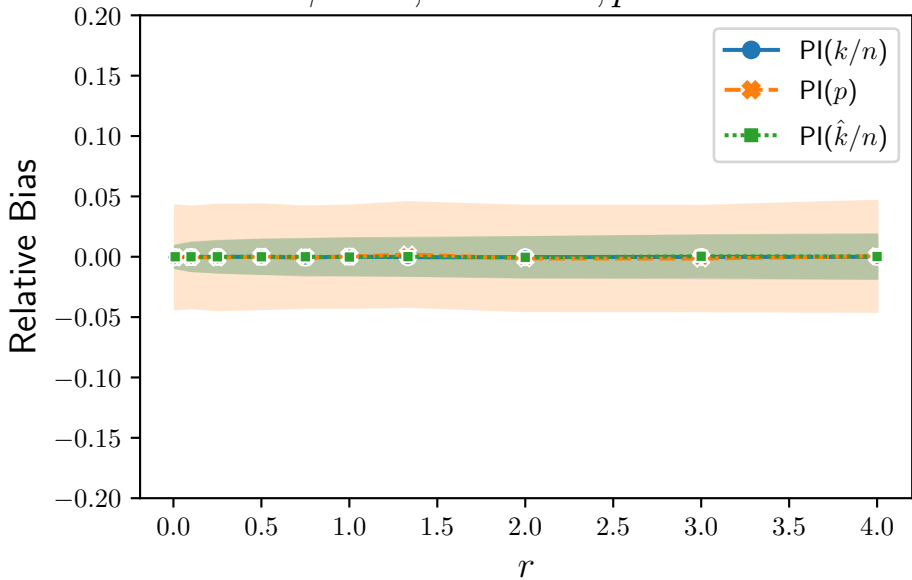

Supplement: supplementary_material [file attachment]

$$n = 15000, k/n = 0.5, r = 1.25$$

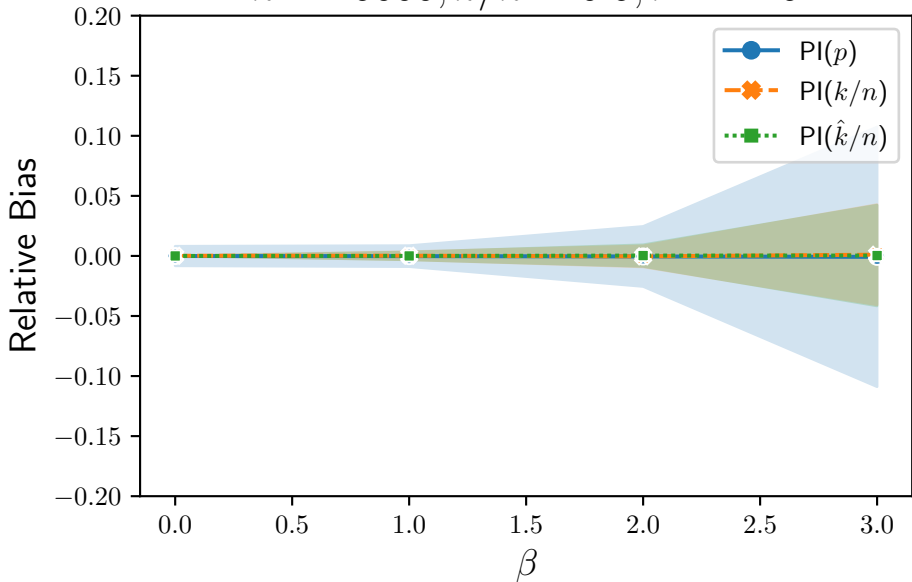

Supplement: supplementary_material [file attachment]

$$n = 15000, p = 0.5, r = 1.25$$

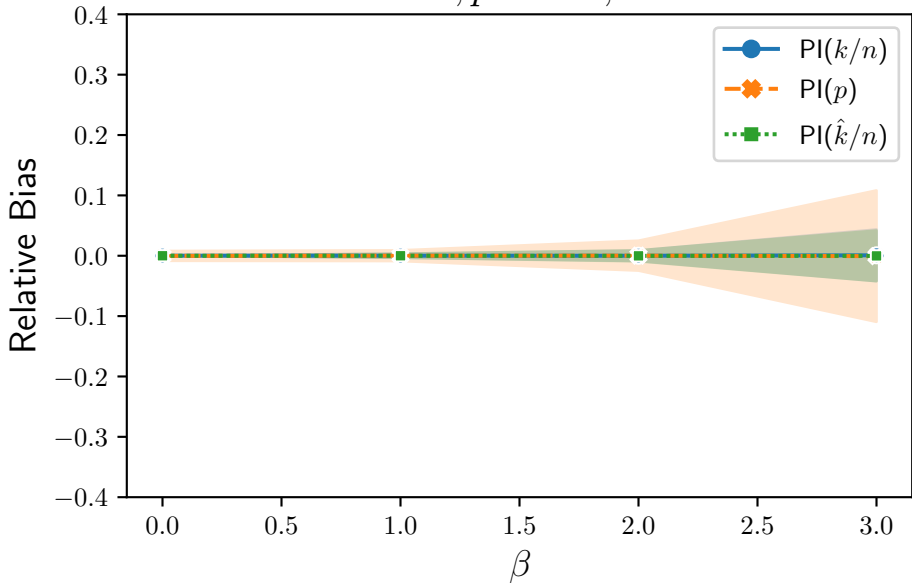

Supplement: supplementary_material [file attachment]

$$\beta = 2, n = 5000, k/n = 0.15$$

Relative Bias

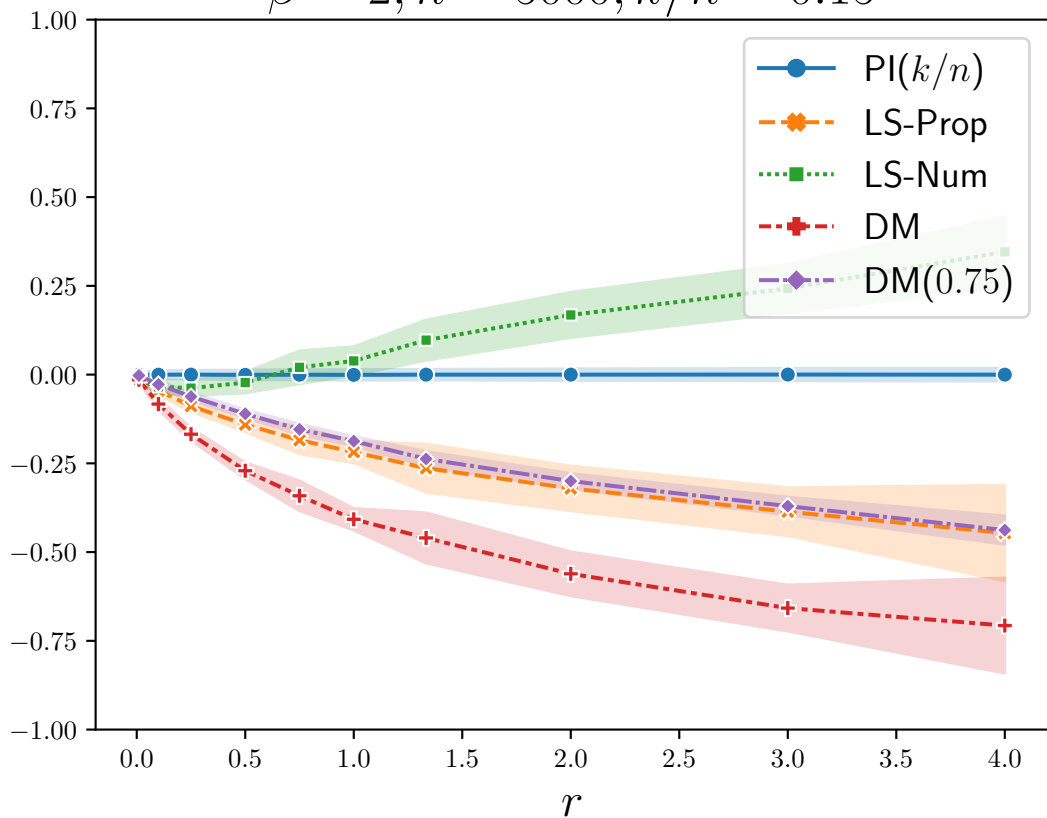

Supplement: supplementary_material [file attachment]

$$\beta = 2, n = 5000, r = 1.25$$

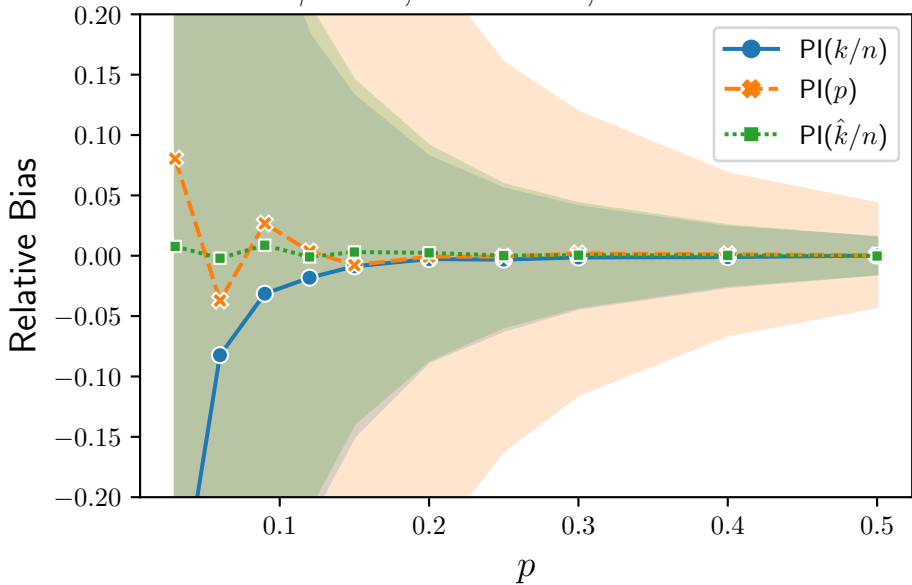

Supplement: supplementary_material [file attachment]

$$\beta = 2, p = 0.15, r = 1.25$$

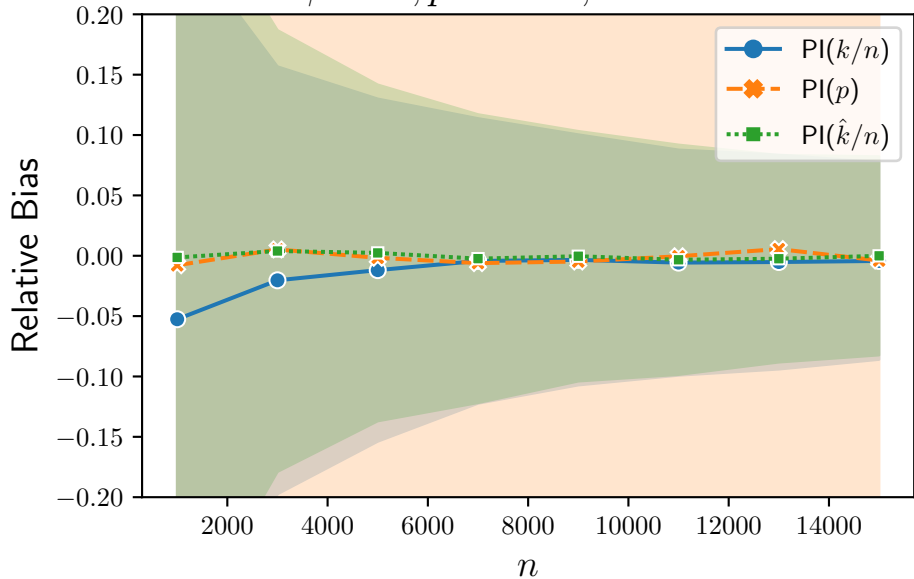

Supplement: supplementary_material [file attachment]

$$\beta = 2, p = 0.5, r = 1.25$$

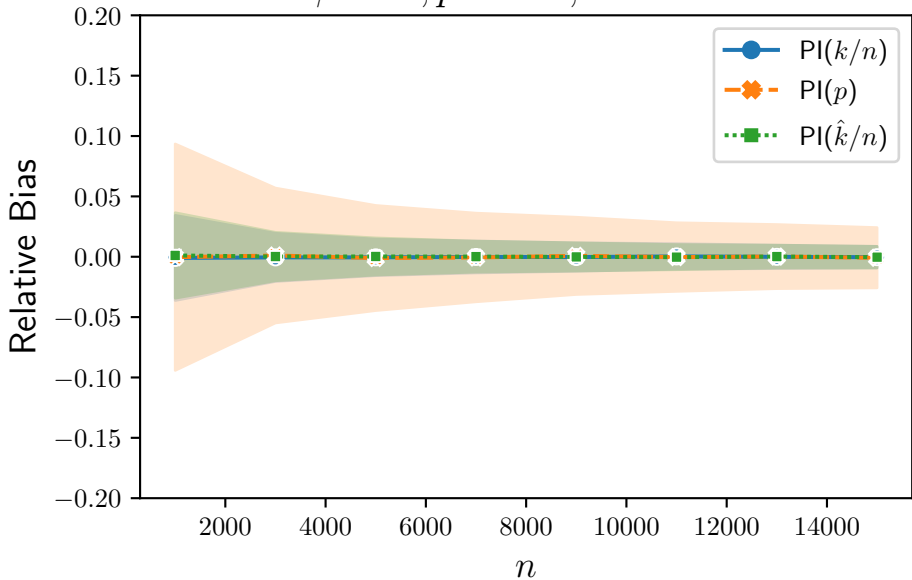

Supplement: supplementary_material [file attachment]

$$\beta = 1, k/n = 0.05, r = 1.25$$

Relative Bias

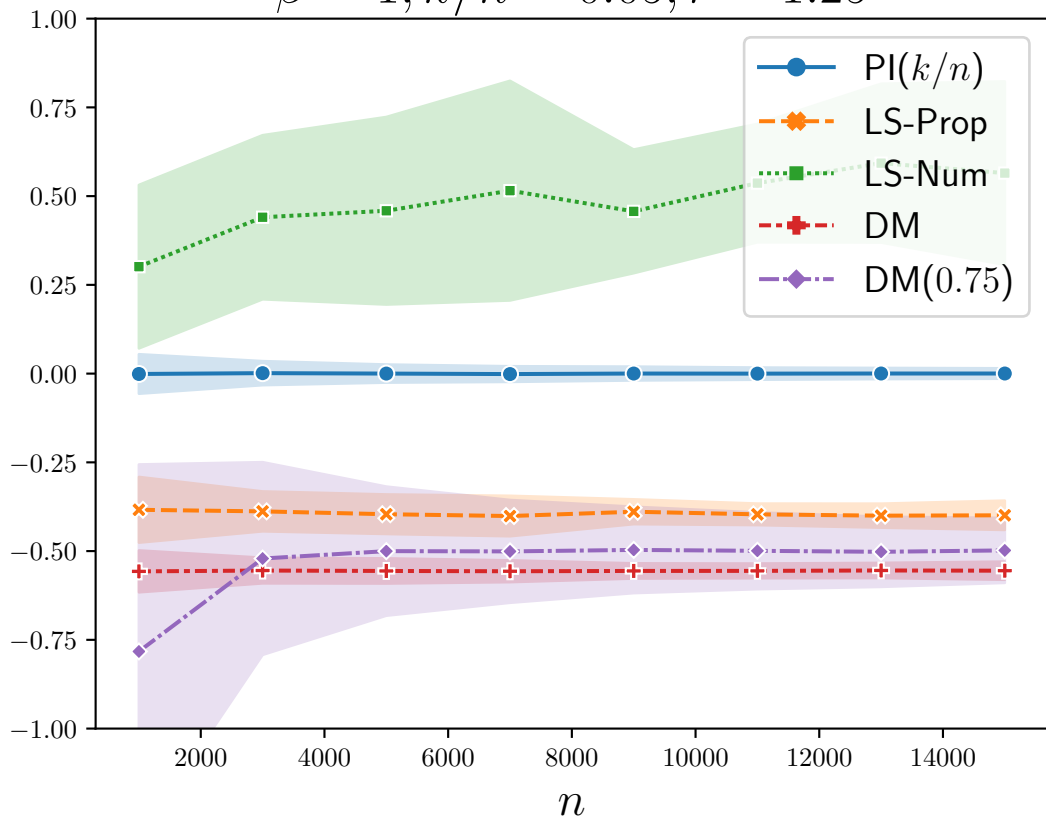

Supplement: supplementary_material [file attachment]

$$\beta = 1, n = 5000, r = 1.25$$

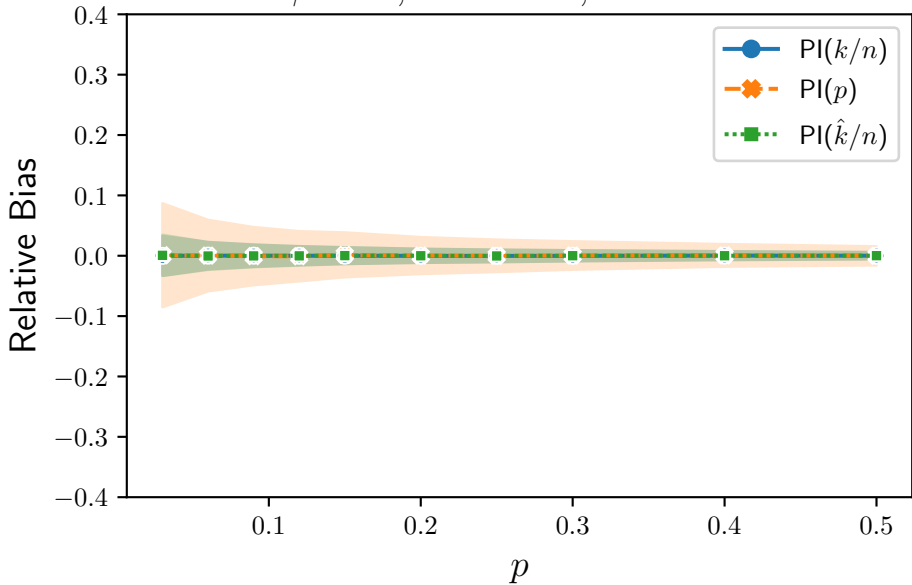

Supplement: supplementary_material [file attachment]

$$\beta = 1, n = 15000, p = 0.05$$

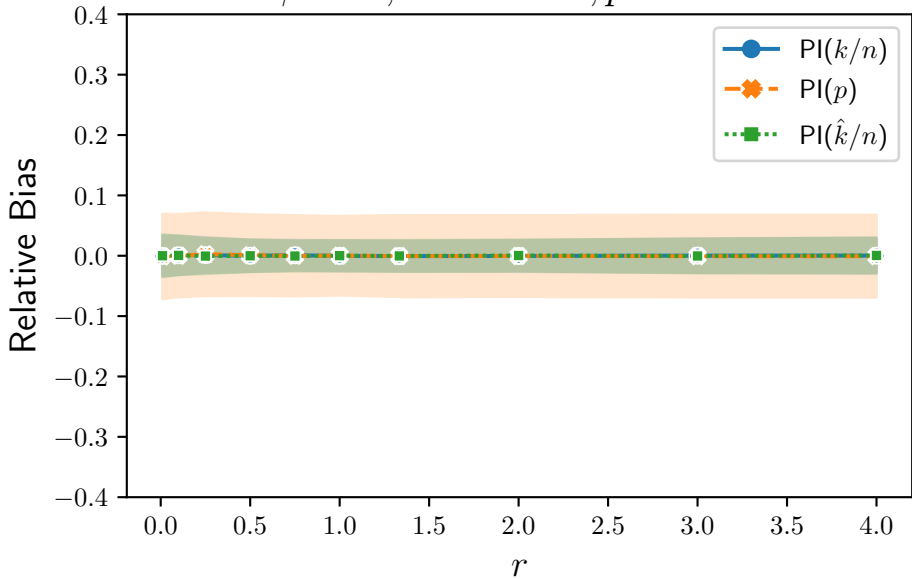

Supplement: supplementary_material [file attachment]

$$\beta = 1, p = 0.05, r = 1.25$$

Relative Bias

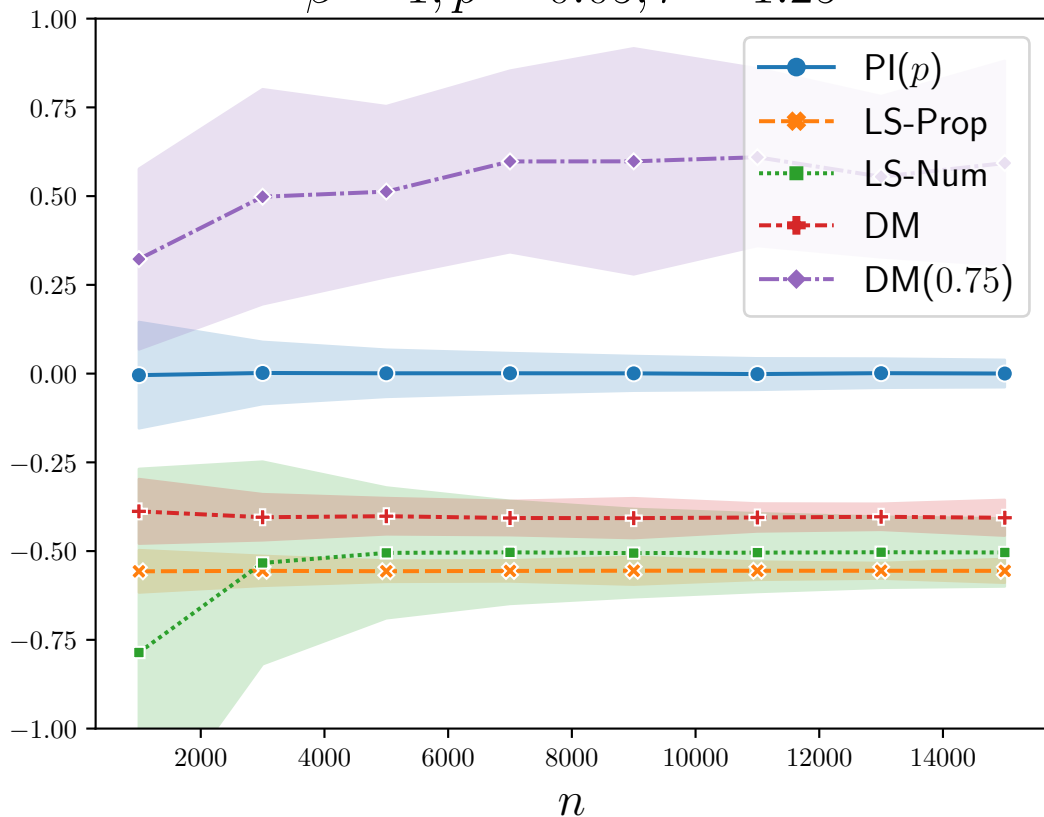

Supplement: supplementary_material [file attachment]

$$\beta = 2, n = 5000, r = 1.25$$

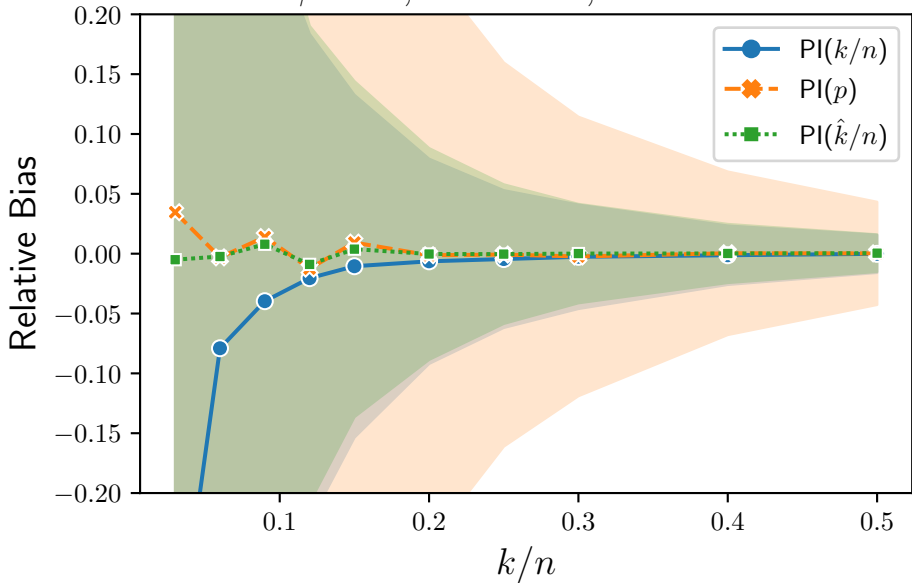

Supplement: supplementary_material [file attachment]

$$\beta = 2, k/n = 0.15, r = 1.25$$

Relative Bias

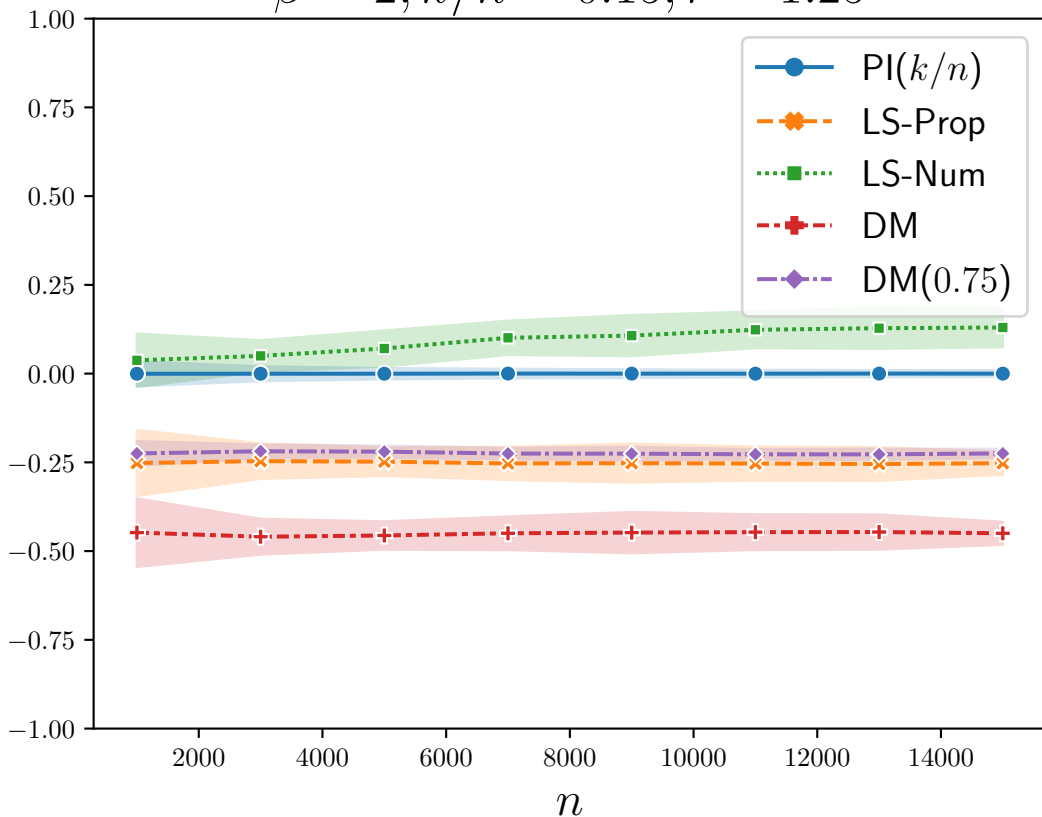

Supplement: supplementary_material [file attachment]

$$\beta = 1, n = 5000, p = 0.05$$

Relative Bias

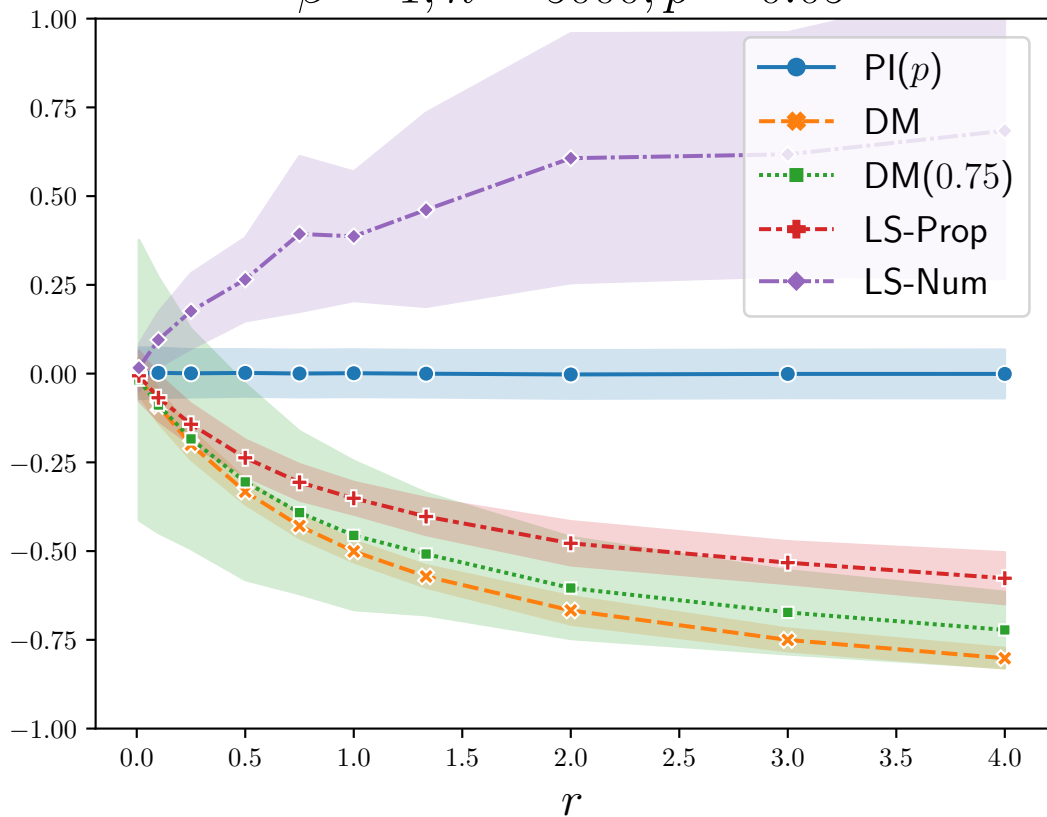

Supplement: supplementary_material [file attachment]

$n = 15000, k/n = 0.5, r = 1.25$

Relative Bias

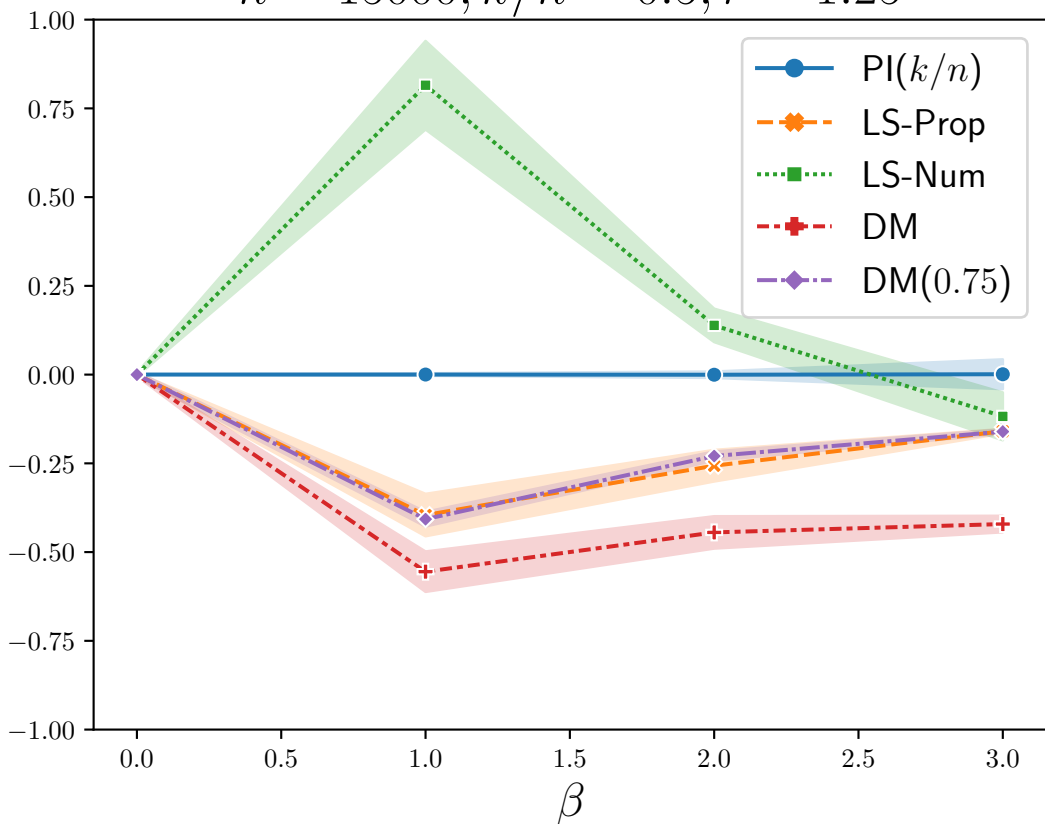

Supplement: supplementary_material [file attachment]

$$\beta = 2, p = 0.15, r = 1.25$$

Relative Bias

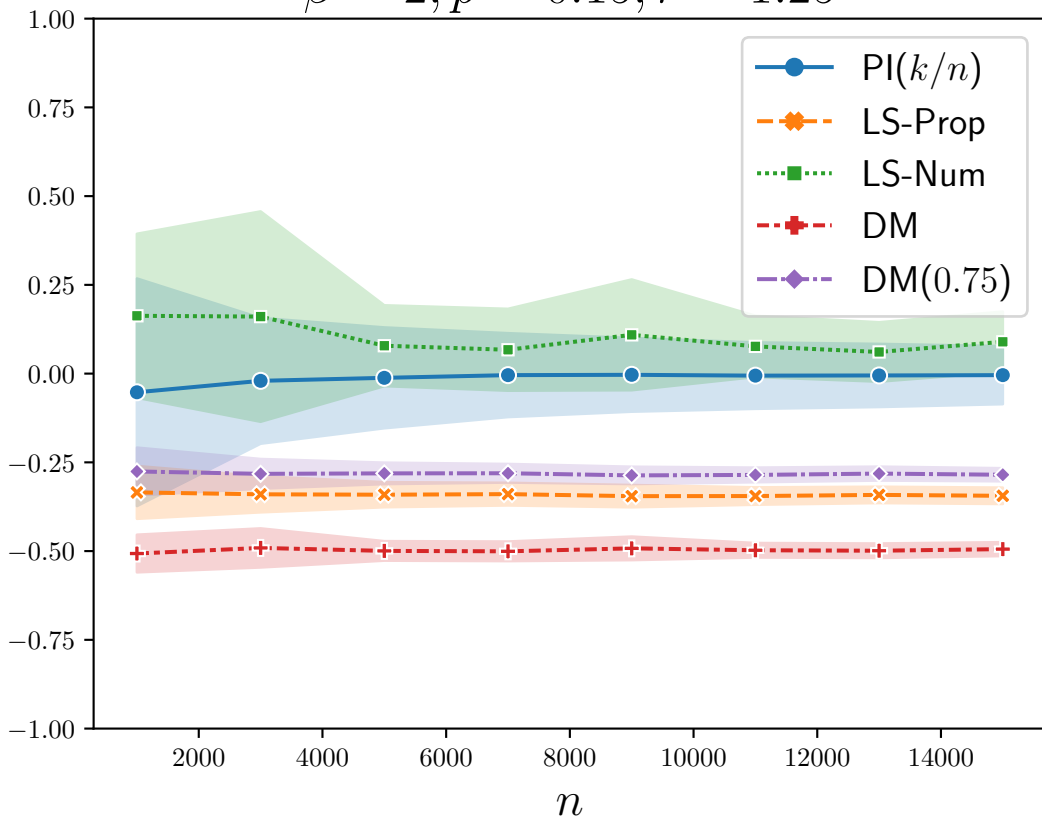

Supplement: supplementary_material [file attachment]

$$\beta = 2, p = 0.15, r = 1.25$$

Relative Bias

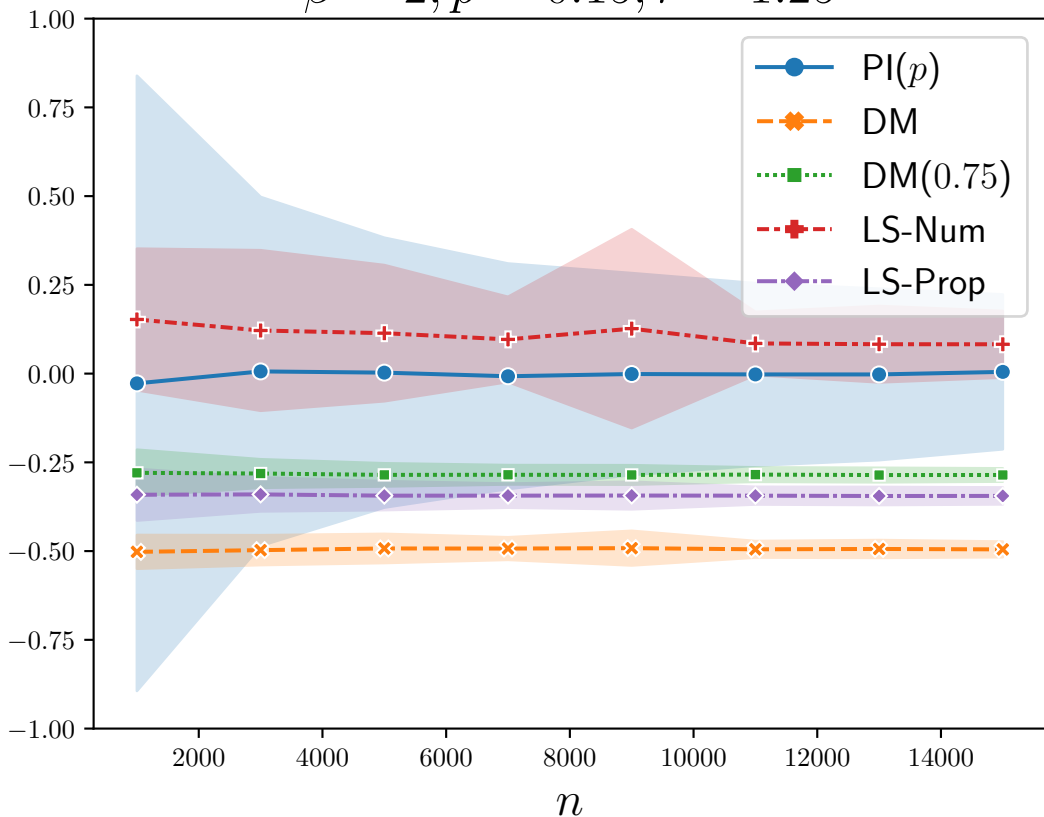

Supplement: supplementary_material [file attachment]

$$\beta = 2, n = 5000, p = 0.5$$

Relative Bias

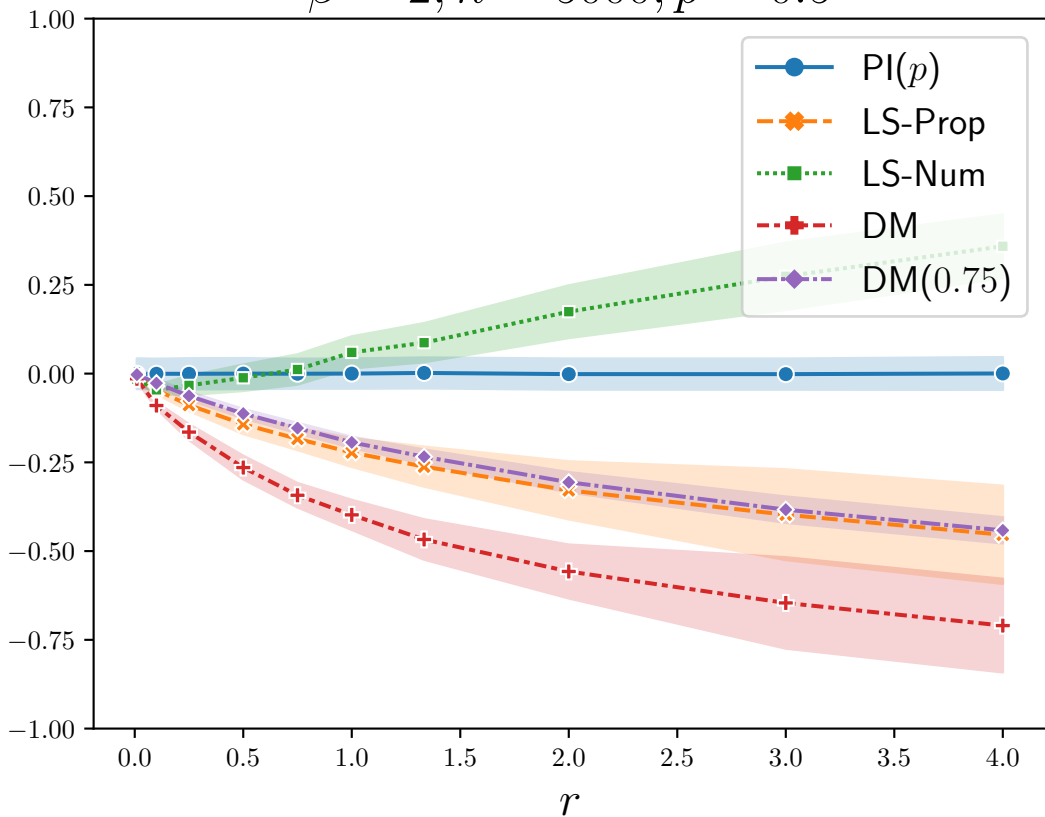

Supplement: supplementary_material [file attachment]

$$\beta = 1, n = 5000, k/n = 0.05$$

Relative Bias

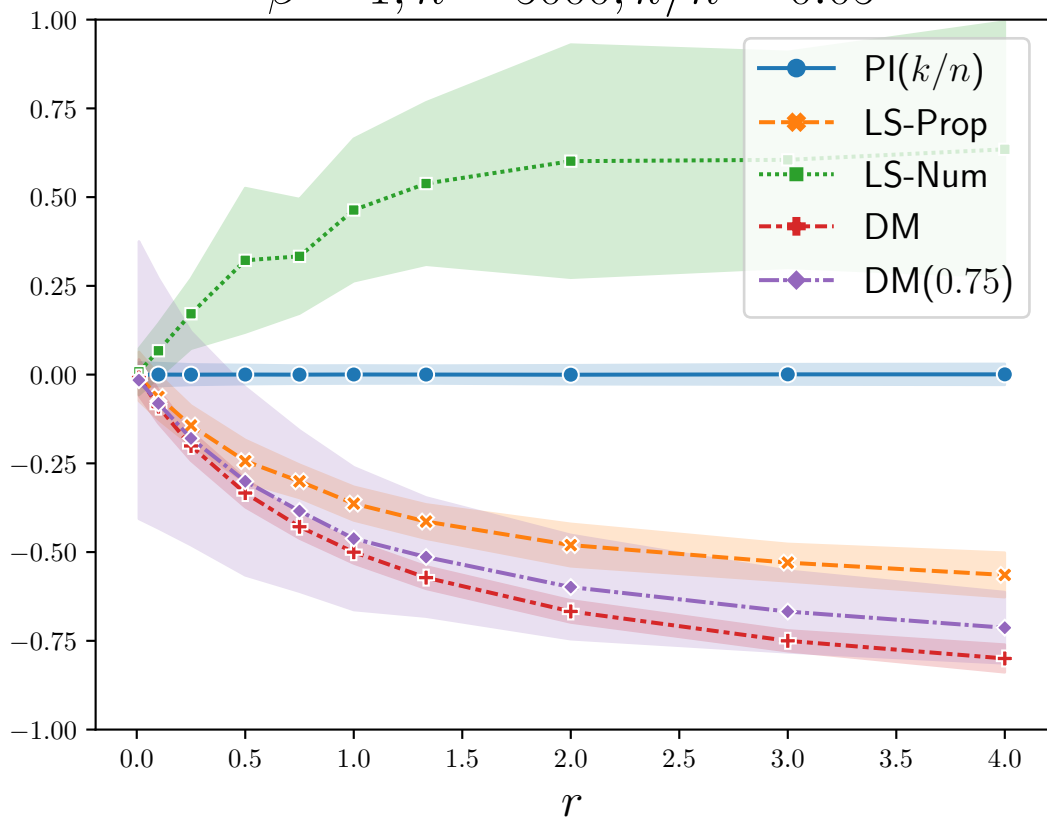

Supplement: supplementary_material [file attachment]

$$\beta = 1, n = 5000, r = 1.25$$

Relative Bias

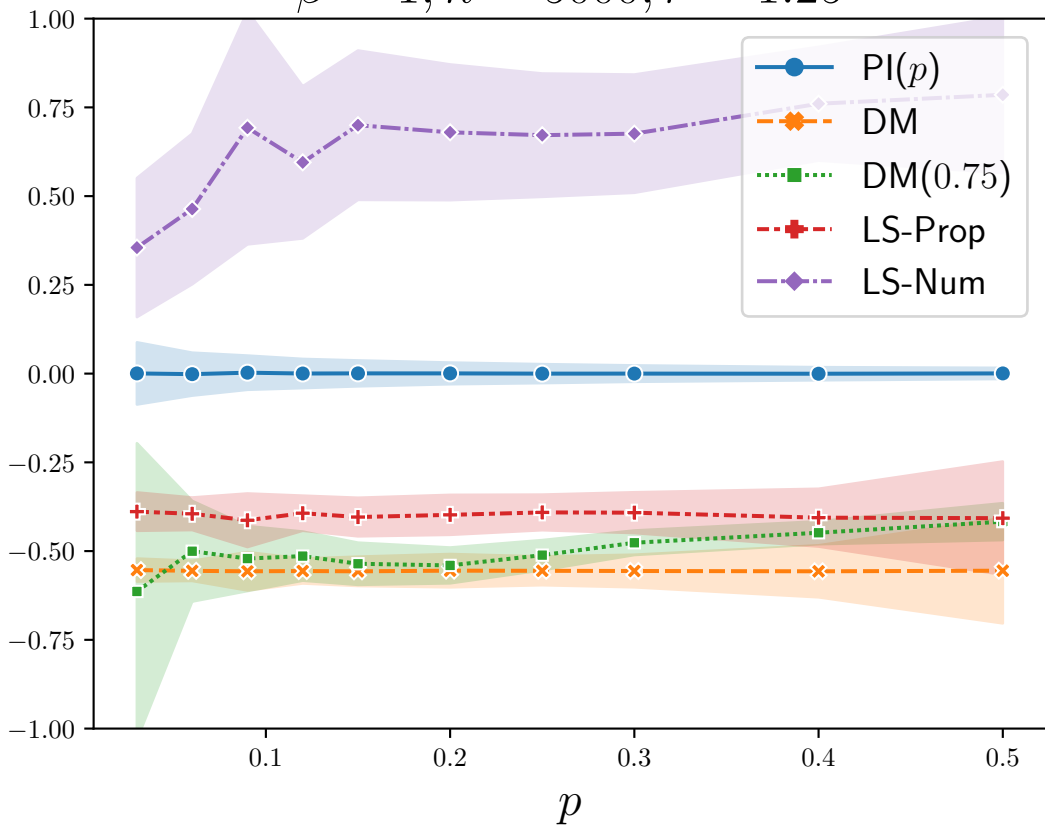

Supplement: supplementary_material [file attachment]

$$\beta = 2, n = 5000, r = 1.25$$

Relative Bias

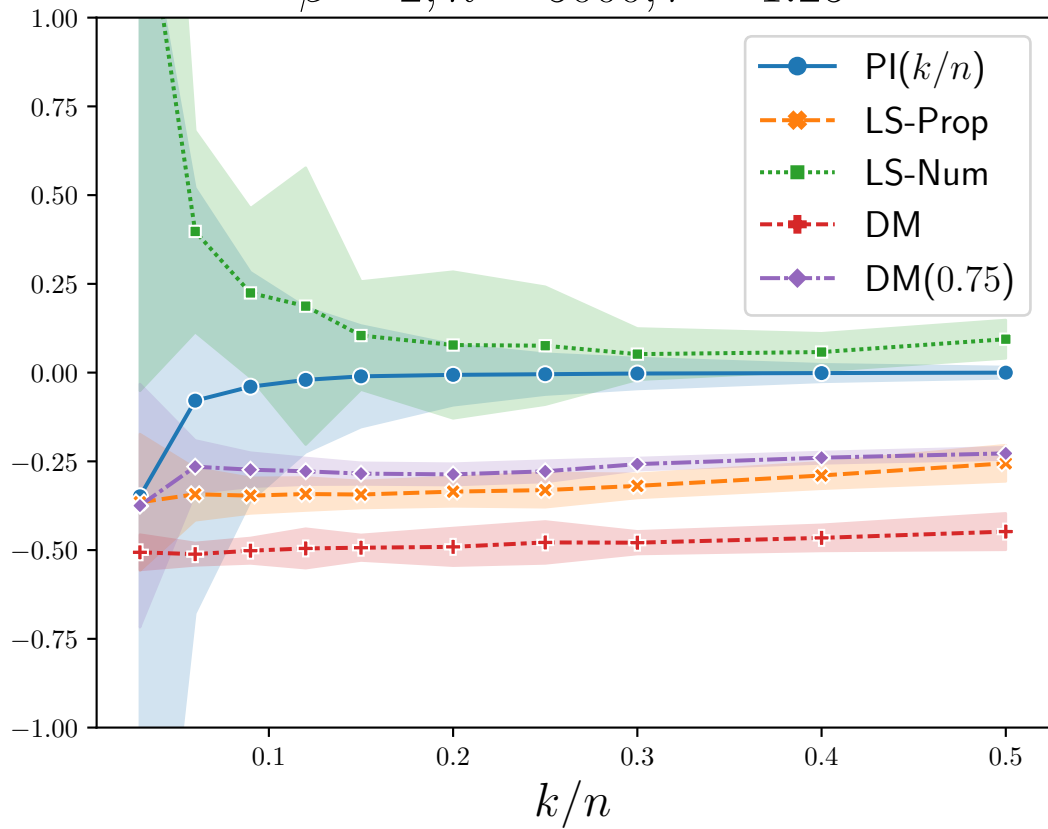

Supplement: supplementary_material [file attachment]

$$\beta = 1, p = 0.05, r = 1.25$$

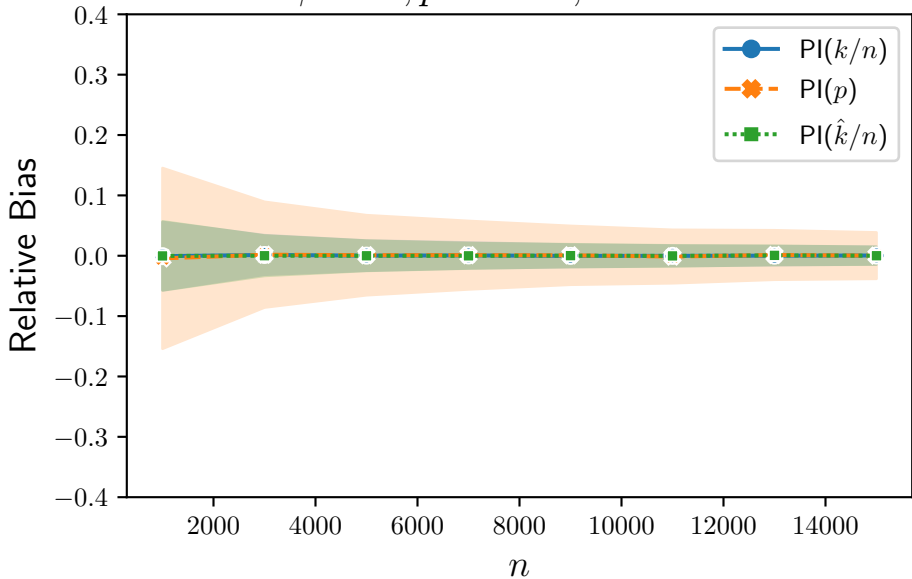

Supplement: supplementary_material [file attachment]

$$\beta = 2, n = 5000, r = 1.25$$

Relative Bias

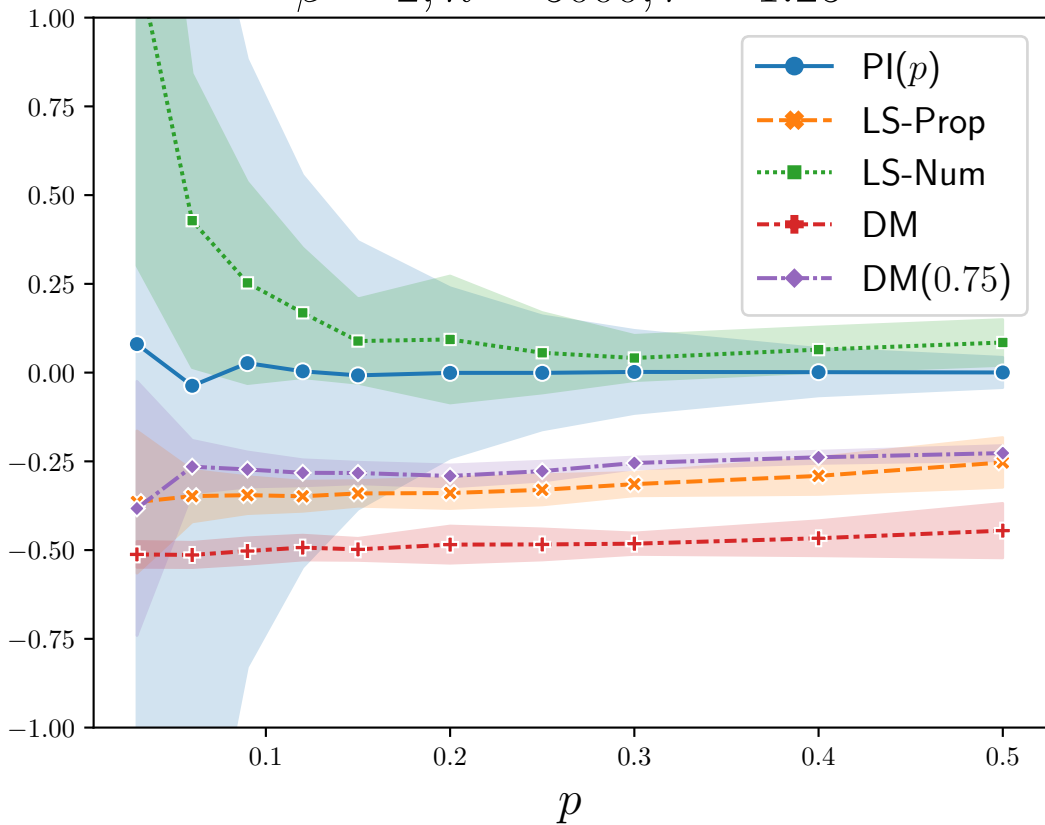

Supplement: supplementary_material [file attachment]
